# Supplementary material for: Use of intracardiac echocardiography and three-dimensional mapping during catheter ablation for atrial fibrillation is associated with reduced complications: a retrospective analysis of United States Medicare Fee-For-Service Database
Source: Atypon-hosted journal article supplement (doi:10.57264/cer-2026-0037), 2026-06-22
Supplement: supplementary figures.docx [file supplementary%20figures.docx]

**Supplementary Figure 1. Kaplan-Meier curve for cardiac perforation – Patients treated in non-CTS backup hospitals**

**
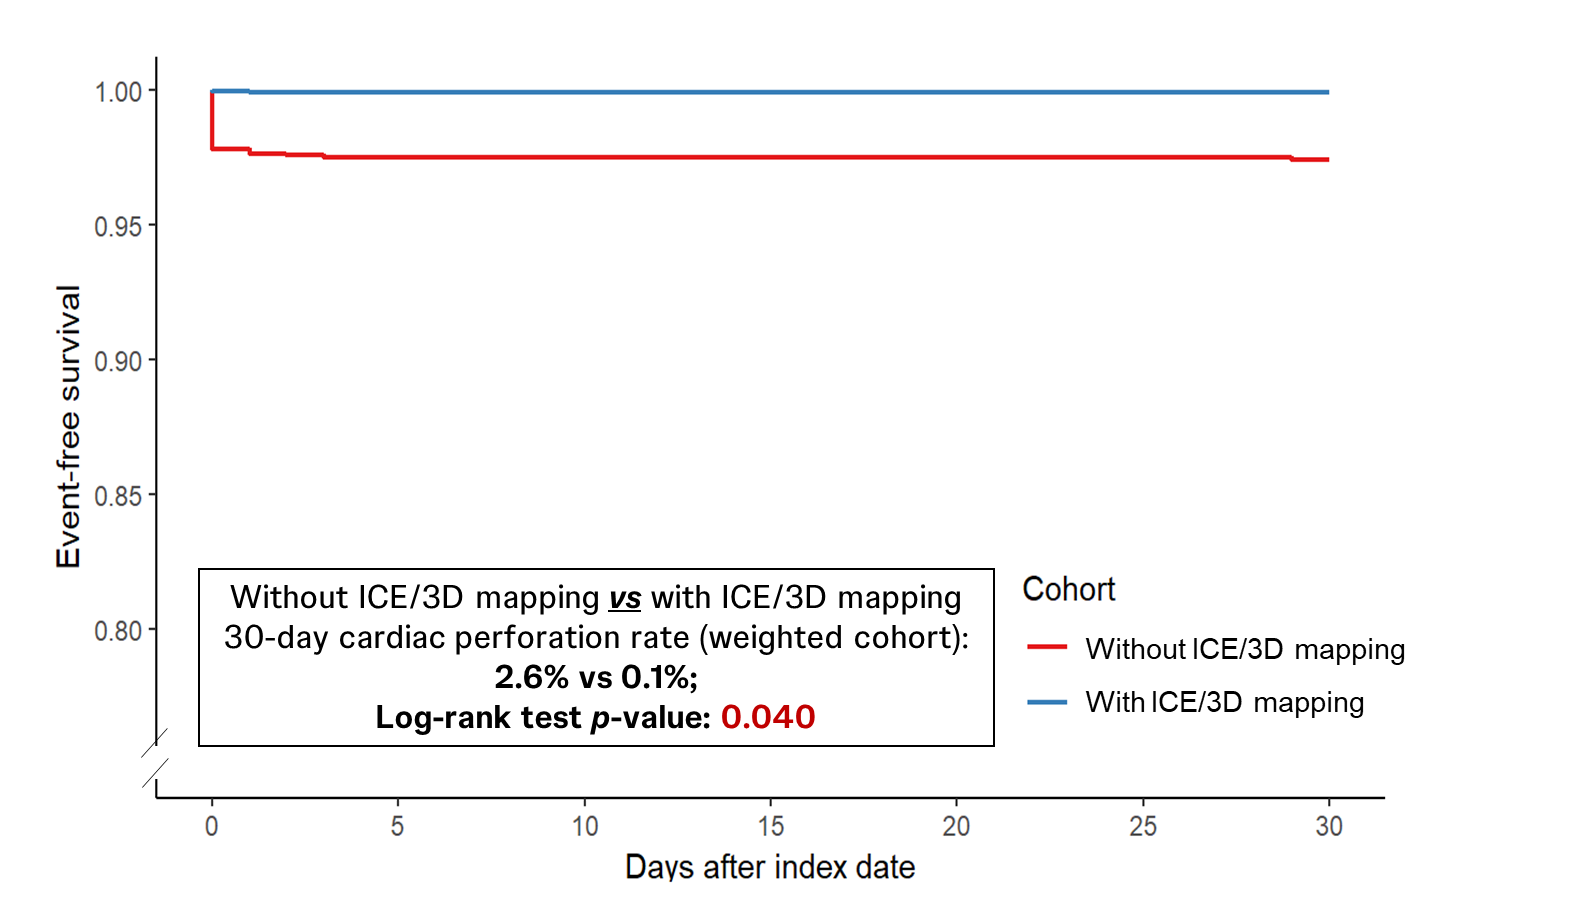
**

**Supplementary Figure 2. Kaplan-Meier curve for death – Patients treated in non-CTS backup hospitals**

**
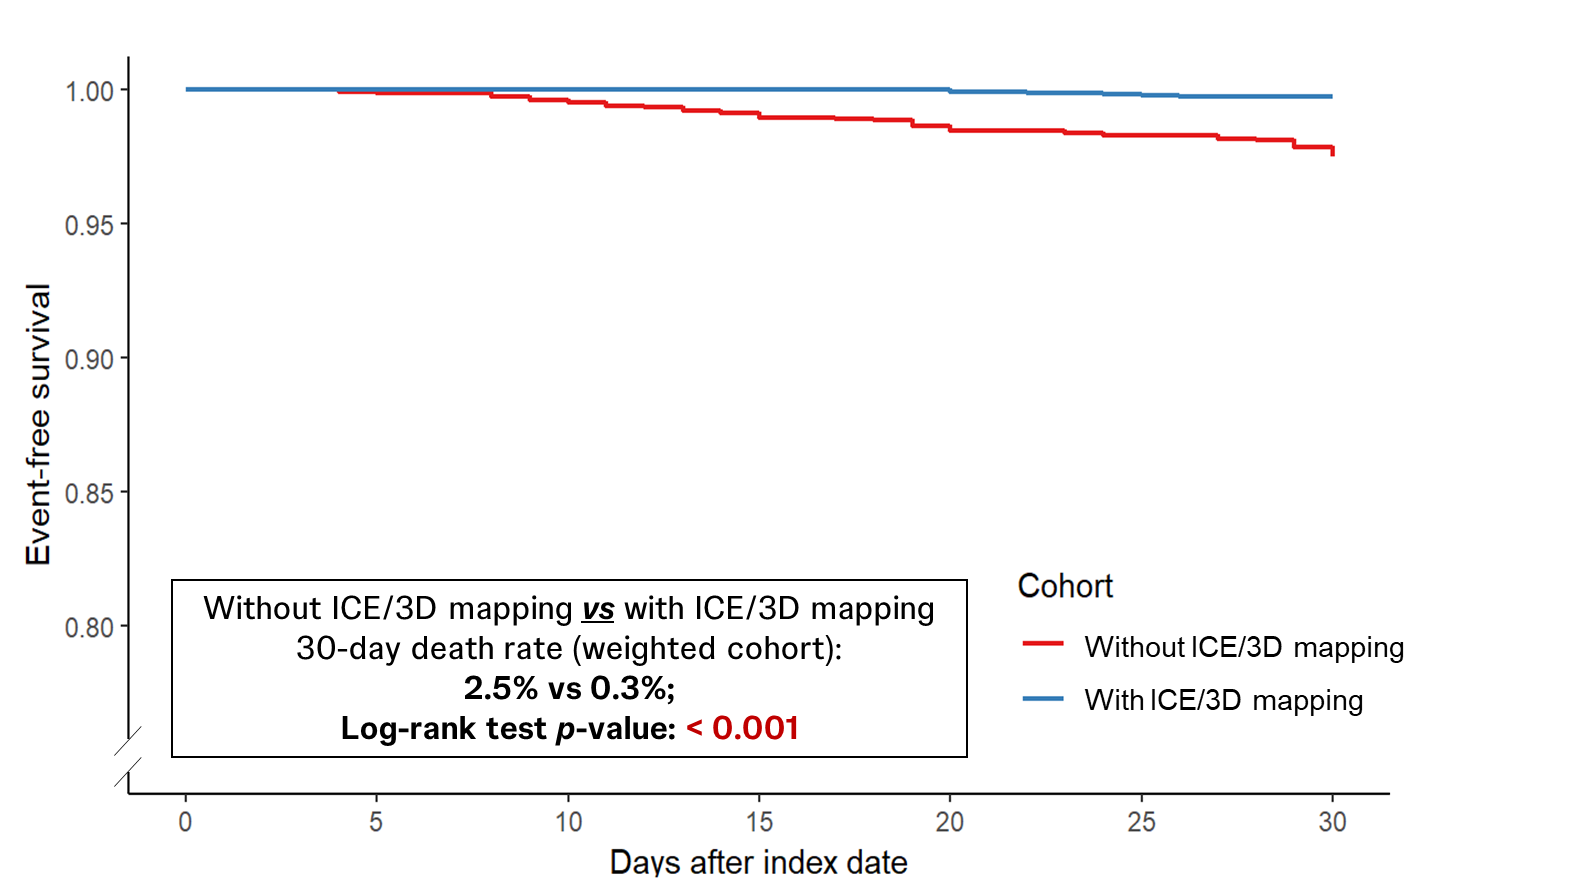
**
